# Supplementary material for: Activating the Body–Brain Axis: Auricular Vagus Nerve Stimulation Facilitates Learning from Reward in Health and Depression
Source: Research Square preprint supplement (doi:10.21203/rs.3.rs-6760313/v1), 2025-11-13
Supplement: Supplementary file 1 [file 443377760daf52ffcc88b98e.docx]

**Supplementary Information:**

**
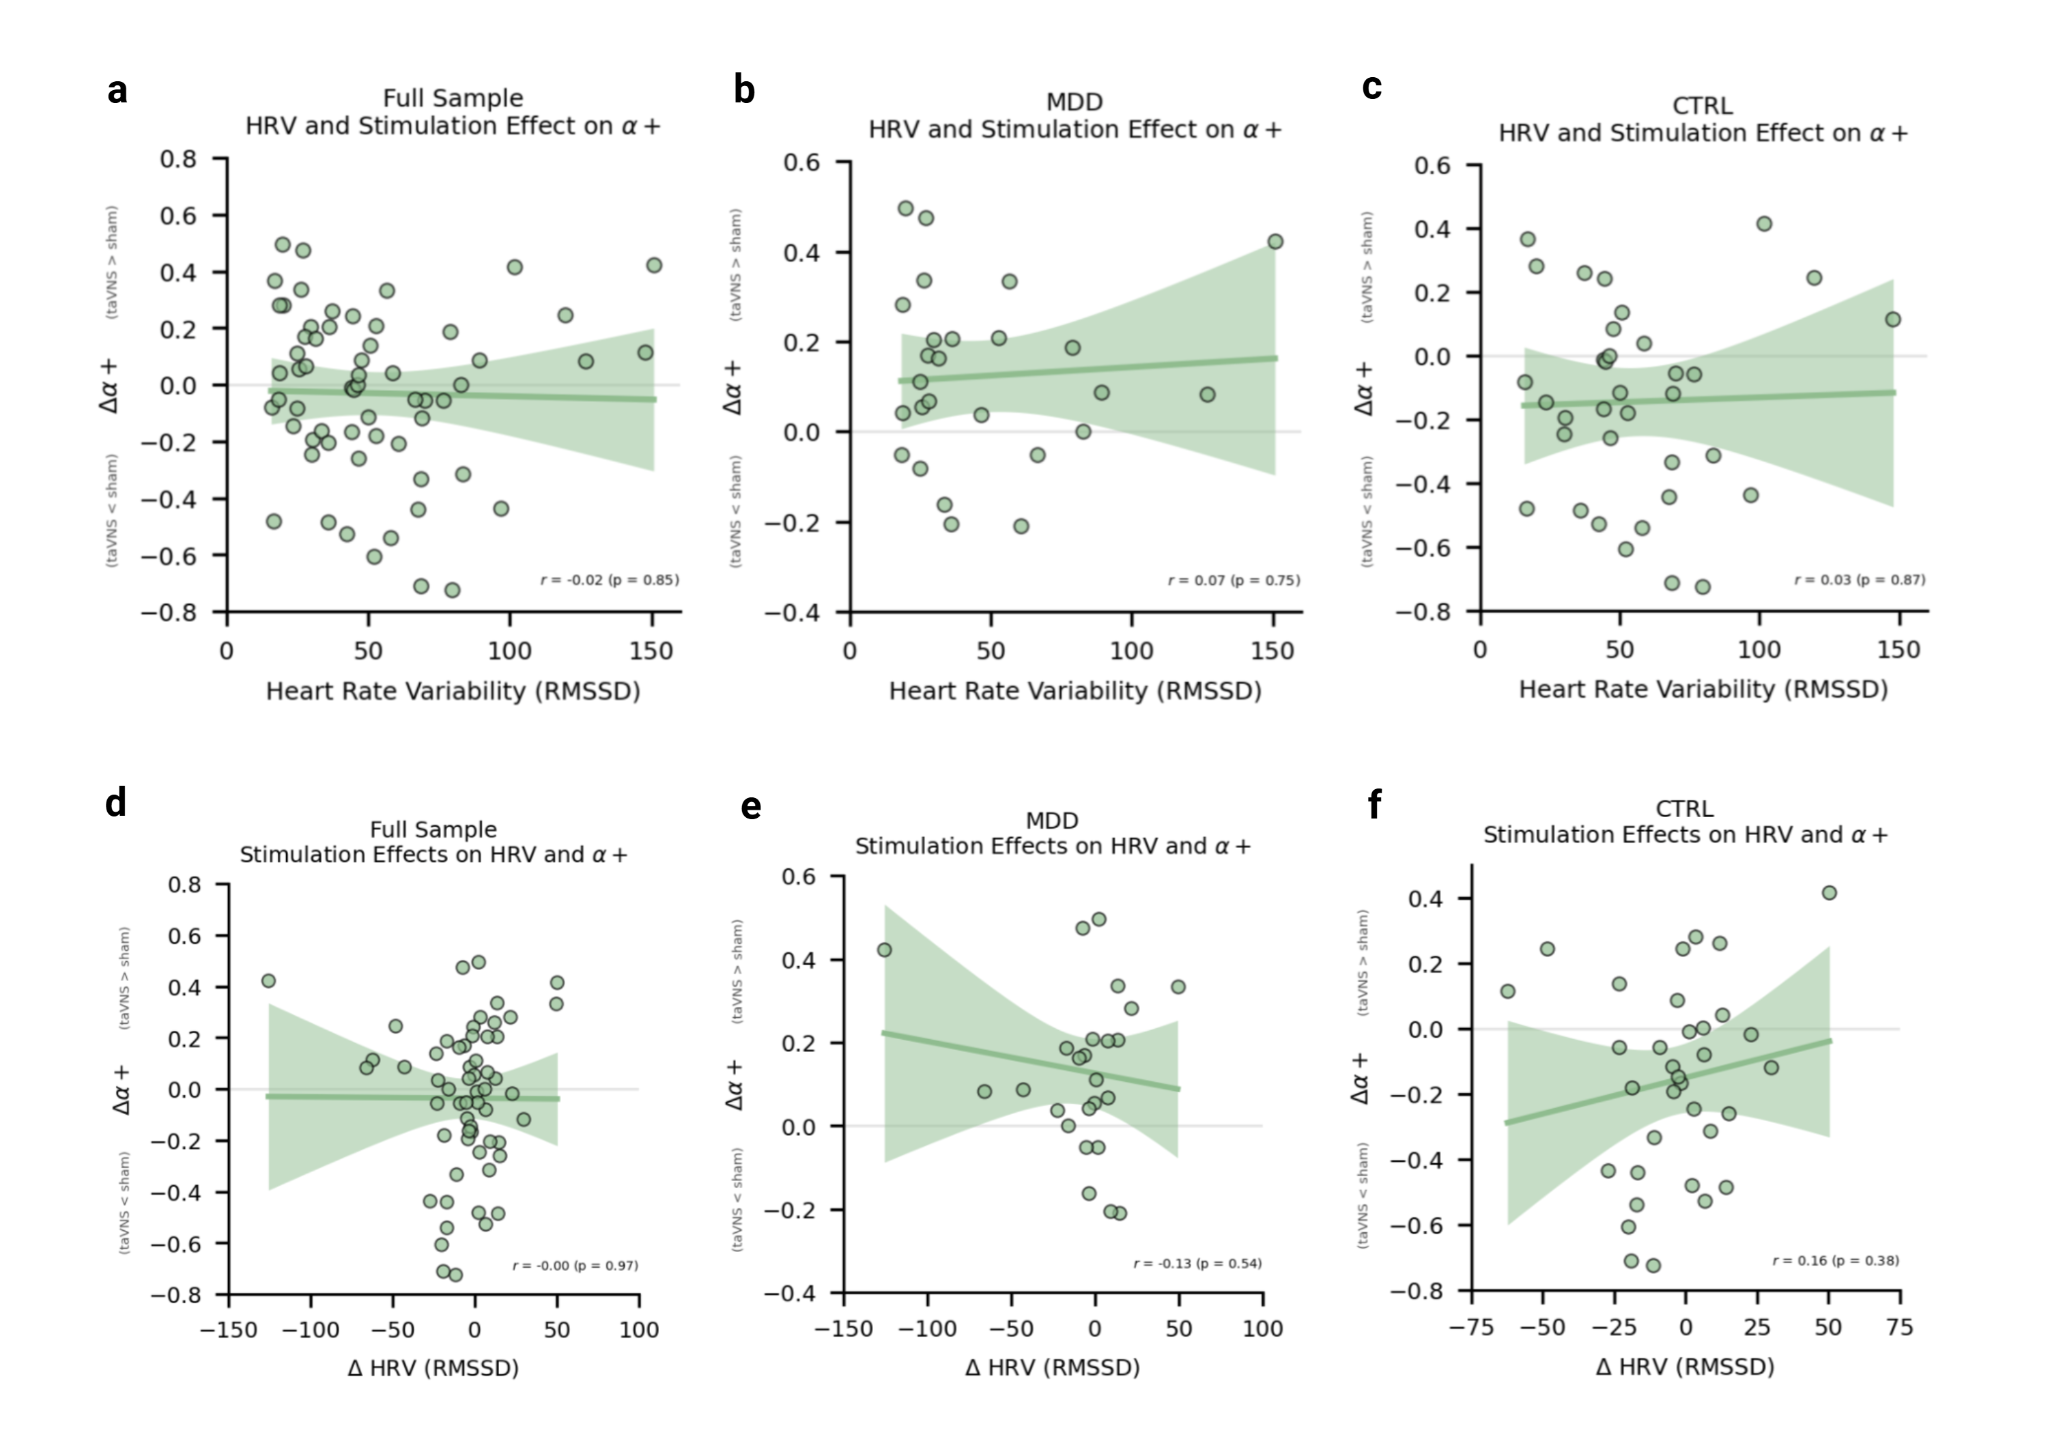
**

**Supplementary Fig. S1.** No associations between Heart Rate Variability (HRV) and stimulation-induced changes in α+. **a-c:** Associations between baseline HRV and Δα+ for the combined sample (a), patients (b), and healthy controls (c). **d-e:** Associations between stimulation-induced changes in HRV and Δα+ for the combined sample (d), patients (e), and healthy controls (f).

**Supplementary Table S1**. **Effect of stimulation on reaction time in the training phase*.***

| ***Effect/parameter*** | ***numDF*** | ***denDF*** | ***F-value*** | ***p-value*** |
| --- | --- | --- | --- | --- |
| ***(Intercept)*** | *1* | *1957* | *0.00* | *0.95* |
| ***Group (MDD)*** | *1* | *89* | *0.64* | *0.43* |
| ***Stimulation (taVNS)*** | *1* | *1957* | *0.52* | *0.47* |
| ***Trial type*** | *2* | *1957* | *0.45* | *0.64* |
| ***Block*** | *3* | *1957* | *135.74* | *< 0.001* |
| ***Test day*** | *1* | *1957* | *36.58* | *< 0.001* |
| ***Age*** | *1* | *89* | *11.13* | *0.00* |
| ***Sex*** | *1* | *89* | *0.00* | *0.96* |
| ***Group:intervention*** | *1* | *1957* | *0.27* | *0.61* |
| ***Group:trialtype*** | *2* | *1957* | *0.56* | *0.57* |
| ***Intervention:trialtype*** | *2* | *1957* | *2.11* | *0.12* |
| ***Group:intervention:trialtype*** | *2* | *1957* | *0.02* | *0.98* |

**Supplementary Table S2.** **Mean (s.d.) RLDDM parameter estimates by group and stimulation condition.**

|  | | ***Neg. learning rate α–*** | | ***Pos. learning rate α+*** | | ***Drift rate***  ***v*** | | ***Boundary separation a*** | | ***Non-decision time***  ***τ*** | | ***Boundary decay***  ***bp*** | |
| --- | --- | --- | --- | --- | --- | --- | --- | --- | --- | --- | --- | --- | --- |
| ***Control*** | ***sham*** | *0.18 (0.27)* | | *0.42 (0.26)* | | *2.45*  *(1.31)* | | *2.01*  *(0.24)* | | *0.32*  *(0.09)* | | *-0.07*  *(0.08)* | |
| ***taVNS*** | *0.18*  *(0.27)* | | *0.32*  *(0.22)* | | *2.66*  *(1.51)* | | *1.95*  *(0.32)* | | *0.34*  *(0.09)* | | *-0.08*  *(0.07)* | |
| ***MDD*** | ***sham*** | *0.13*  *(0.22)* | | *0.17*  *(0.10)* | | *2.95*  *(2.05)* | | *1.99*  *(0.31)* | | *0.36*  *(0.12)* | | *-0.05*  *(0.09)* | |
| ***taVNS*** | *0.09*  *(0.19)* | | *0.29*  *(0.17)* | | *2.97*  *(1.77)* | | *1.94*  *(0.33)* | | *0.36*  *(0.11)* | | *-0.06*  *(0.06)* | |

**Supplementary Table S3. Effect of stimulation on accuracy and reaction time during choose-A trials.**

| ***Accuracy*** | | | | |
| --- | --- | --- | --- | --- |
| ***Effect/parameter*** | ***numDF*** | ***denDF*** | ***F-value*** | ***p-value*** |
| ***(Intercept)*** | *1* | *89* | *0.01* | *0.91* |
| ***Group*** | *1* | *89* | *0.31* | *0.58* |
| ***Stimulation*** | ***1*** | ***76*** | ***4.03*** | ***0.05*** |
| ***Test day*** | *1* | *76* | *28.38* | *< 0.001* |
| ***Age*** | *1* | *89* | *0.02* | *0.90* |
| ***Sex*** | *1* | *89* | *0.14* | *0.71* |
| ***Group:intervention*** | *1* | *76* | *0.02* | *0.88* |
| ***Reaction time*** | | | | |
| ***Effect/parameter*** | ***numDF*** | ***denDF*** | ***F-value*** | ***p-value*** |
| ***(Intercept)*** | *1* | *89* | *0.026* | *0.87* |
| ***(Intercept)*** | *1* | *89* | *0.026* | *0.87* |
| ***Group*** | *1* | *89* | *0.01* | *0.93* |
| ***Stimulation*** | *1* | *76* | *0.28* | *0.60* |
| ***Test day*** | *1* | *76* | *4.02* | *0.05* |
| ***Age*** | *1* | *89* | *0.43* | *0.51* |
| ***Sex*** | *1* | *89* | *0.41* | *0.53* |
| ***Group:intervention*** | *1* | *76* | *0.35* | *0.56* |

**Supplementary Table S4.** **Effect of stimulation on accuracy and reaction time during avoid-B trials.**

| ***Accuracy*** | | | | |
| --- | --- | --- | --- | --- |
| ***Effect/parameter*** | ***numDF*** | ***denDF*** | ***F-value*** | ***p-value*** |
| ***(Intercept)*** | *1* | *89* | *0.02* | *0.90* |
| ***Group*** | *1* | *89* | *0.27* | *0.61* |
| ***Stimulation*** | *1* | *76* | *0.06* | *0.81* |
| ***Test day*** | *1* | *76* | *24.72* | *< 0.001* |
| ***Age*** | *1* | *89* | *3.12* | *0.08* |
| ***Sex*** | *1* | *89* | *2.04* | *0.16* |
| ***Group:intervention*** | *1* | *76* | *0.00* | *1.00* |
| ***Reaction time*** | | | | |
| ***Effect/parameter*** | ***numDF*** | ***denDF*** | ***F-value*** | ***p-value*** |
| ***(Intercept)*** | *1* | *89* | *0.00* | *0.95* |
| ***Group*** | *1* | *89* | *0.03* | *0.86* |
| ***Stimulation*** | *1* | *76* | *0.40* | *0.53* |
| ***Test day*** | ***1*** | ***76*** | ***12.37*** | ***< 0.001*** |
| ***Age*** | *1* | *89* | *0.44* | *0.51* |
| ***Sex*** | *1* | *89* | *0.58* | *0.45* |
| ***Group:intervention*** | *1* | *76* | *0.13* | *0.72* |

**Supplementary Table S5:** **Effect of stimulation on accuracy and reaction time in the training phase *- corrected for SNRI and tricyclic drugs.***

| ***Accuracy*** | | | | |
| --- | --- | --- | --- | --- |
| ***Effect/parameter*** | ***numDF*** | ***denDF*** | ***F-value*** | ***p-value*** |
| ***(Intercept)*** | *1* | *1900* | *0.27* | *0.60* |
| ***Group*** | *1* | *86* | *0.50* | *0.48* |
| ***Stimulation*** | *1* | *1900* | *0.00* | *1.00* |
| ***Trial type*** | *2* | *1900* | *154.25* | *< 0.001* |
| ***Block*** | *3* | *1900* | *33.10* | *< 0.001* |
| ***Test day*** | *1* | *1900* | *160.65* | *< 0.001* |
| ***Age*** | *1* | *86* | *8.18* | *0.01* |
| ***Sex*** | *1* | *86* | *0.66* | *0.42* |
| ***Group:intervention*** | *1* | *1900* | *6.34* | *0.01* |
| ***Group:trial type*** | *2* | *1900* | *5.34* | *0.00* |
| ***Intervention:trial type*** | *2* | *1900* | *4.87* | *0.01* |
| ***Group:intervention:trial type*** | *2* | *1900* | *2.72* | *0.07* |
| ***Reaction time*** | | | | |
| ***Effect/parameter*** | ***numDF*** | ***denDF*** | ***F-value*** | ***p-value*** |
| ***(Intercept)*** | *1* | *1900* | *0.00* | *0.95* |
| ***Group*** | *1* | *86* | *0.29* | *0.59* |
| ***Stimulation*** | *1* | *1900* | *0.01* | *0.91* |
| ***Trial type*** | *2* | *1900* | *0.31* | *0.73* |
| ***Block*** | *3* | *1900* | *90.73* | *< 0.001* |
| ***Test day*** | *1* | *1900* | *416.07* | *< 0.001* |
| ***Age*** | *1* | *86* | *7.66* | *0.01* |
| ***Sex*** | *1* | *86* | *0.00* | *0.96* |
| ***Group:intervention*** | *1* | *1900* | *0.09* | *0.76* |
| ***Group:trialtype*** | *2* | *1900* | *0.42* | *0.65* |
| ***Intervention:trialtype*** | *2* | *1900* | *1.06* | *0.35* |
| ***Group:intervention:trialtype*** | *2* | *1900* | *0.01* | *0.99* |

**Supplementary Table S6:** **Estimated marginal means and post-hoc contrasts for stimulation effects by group. Results from the training phase *- corrected for SNRI and tricyclic drugs.***

| ***Stimulation | Group*** | | | | | | |
| --- | --- | --- | --- | --- | --- | --- |
| ***Group*** | ***Contrast*** | ***estimate*** | ***SE*** | ***df*** | ***t.ratio*** | ***p.value*** |
| *MDD* | sham-tvns | *-0.13* | *0.0547* | *1900* | *-2.433* | *0.0151* |
| *CTRL* | sham-tvns | *0.05* | *0.0494* | *1900* | *1.062* | *0.2886* |
| ***Stimulation | Trial type*** | | | | | | |
| **Trial type** | **Contrast** | ***estimate*** | ***SE*** | ***df*** | ***t.ratio*** | ***p.value*** |
| AB | sham-tvns | *-0.20* | *0.06* | *1900* | *-3.19* | *< 0.01* |
| CD | sham-tvns | *0.02* | *0.06* | *1900* | *0.25* | *0.80* |
| EF | sham-tvns | *0.06* | *0.06* | *1900* | *1.00* | *0.32* |

**Supplementary Table S7. Results from the test phase. Effect of stimulation on accuracy and reaction time during choose-A trials *- corrected for SNRI and tricyclic drugs*.**

| ***Accuracy*** | | | | |
| --- | --- | --- | --- | --- |
| ***Effect/parameter*** | ***numDF*** | ***denDF*** | ***F-value*** | ***p-value*** |
| ***(Intercept)*** | *1* | *88* | *0.00* | *0.97* |
| ***Group*** | *1* | *88* | *0.39* | *0.53* |
| ***Stimulation*** | *1* | *75* | *4.27* | *0.04* |
| ***Test day*** | *1* | *75* | *29.39* | *< 0.001* |
| ***Age*** | *1* | *88* | *0.01* | *0.92* |
| ***Sex*** | *1* | *88* | *0.16* | *0.69* |
| ***Group:stimulation*** | *1* | *75* | *0.06* | *0.81* |
| ***Reaction time*** | | | | |
| ***(Intercept)*** | *1* | *88* | *0.02* | *0.88* |
| ***Group*** | *1* | *88* | *0.04* | *0.84* |
| ***Stimulation*** | *1* | *75* | *0.41* | *0.52* |
| ***Test day*** | *1* | *75* | *6.65* | *0.01* |
| ***Age*** | *1* | *88* | *0.48* | *0.49* |
| ***Sex*** | *1* | *88* | *0.11* | *0.74* |
| ***Group:stimulation*** | *1* | *75* | *0.35* | *0.56* |

**Supplementary Table S8. Results from the test phase. Effect of stimulation on accuracy and reaction time during avoid-B trials *- corrected for SNRI and tricyclic drugs*.**

| ***Accuracy*** | | | | |
| --- | --- | --- | --- | --- |
|  | ***numDF*** | **denDF** | **F-value** | **p-value** |
| ***(Intercept)*** | *1* | *88* | *0.01* | *0.90* |
| ***Group*** | *1* | *88* | *0.37* | *0.55* |
| ***Stimulation*** | *1* | *75* | *0.00* | *0.96* |
| ***Test day*** | *1* | *75* | *23.52* | *< 0.001* |
| ***Age*** | *1* | *88* | *2.80* | *0.10* |
| ***Sex*** | *1* | *88* | *0.89* | *0.35* |
| ***Group:stimulation*** | *1* | *75* | *0.00* | *0.95* |
| ***Reaction time*** | | | | |
| ***(Intercept)*** | *1* | *88* | *0.00* | *0.96* |
| ***Group*** | *1* | *88* | *0.10* | *0.75* |
| ***Stimulation*** | *1* | *75* | *0.59* | *0.45* |
| ***Test day*** | *1* | *75* | *16.98* | *< 0.001* |
| ***Age*** | *1* | *88* | *0.49* | *0.49* |
| ***Sex*** | *1* | *88* | *0.07* | *0.79* |
| ***Group:stimulation*** | *1* | *75* | *0.16* | *0.69* |

**Supplementary Table S9. Effect of stimulation on accuracy and reaction time during the training phase.**Control for potential repetition effect - between‐subjects analysis limited to test day 1 data.

| ***Accuracy*** | | | | |
| --- | --- | --- | --- | --- |
| ***Effect/parameter*** | ***numDF*** | ***denDF*** | ***F-value*** | ***p-value*** |
| ***(Intercept)*** | 1 | 1012 | 1.68 | 0.19 |
| ***Group*** | 1 | 87 | 0.25 | 0.62 |
| ***Stimulation*** | 1 | 87 | 0.07 | 0.80 |
| ***Trial type*** | 2 | 1012 | 54.79 | < 0.001 |
| ***Block*** | 3 | 1012 | 16.54 | < 0.001 |
| ***Age*** | 1 | 87 | 6.74 | 0.01 |
| ***Sex*** | 1 | 87 | 0.47 | 0.49 |
| ***Group:stimulation*** | 1 | 87 | 0.24 | 0.63 |
| ***Group:trial type*** | 2 | 1012 | 1.11 | 0.33 |
| ***Stimulation:trial type*** | 2 | 1012 | 1.80 | 0.17 |
| ***Group:stimulation:trial type*** | 2 | 1012 | 0.38 | 0.69 |
| ***Reaction time*** | | | | |
| ***(Intercept)*** | 1 | 1012 | 0.00 | 0.98 |
| ***Group*** | 1 | 87 | 0.13 | 0.72 |
| ***Stimulation*** | 1 | 87 | 0.18 | 0.67 |
| ***Trial type*** | 2 | 1012 | 4.74 | 0.01 |
| ***Block*** | 3 | 1012 | 56.41 | < 0.001 |
| ***Age*** | 1 | 87 | 1.80 | 0.18 |
| ***Sex*** | 1 | 87 | 0.03 | 0.87 |
| ***Group:stimulation*** | 1 | 87 | 0.81 | 0.37 |
| ***Group:trial type*** | 2 | 1012 | 0.13 | 0.88 |
| ***Stimulation:trial type*** | 2 | 1012 | 0.67 | 0.51 |
| ***Group:stimulation:trial type*** | 2 | 1012 | 1.31 | 0.27 |

**Supplementary Table 10. Effect of stimulation on accuracy during the choice phase for choose-A and avoid-B trials.**Control for potential repetition effect - between‐subjects analysis limited to test day 1 data.

| ***Accuracy Choose-A*** | | | | |
| --- | --- | --- | --- | --- |
|  | ***numDF*** | **denDF** | **F-value** | **p-value** |
| ***(Intercept)*** | 1 | 87 | 0.00 | 0.95 |
| ***Group*** | 1 | 87 | 0.04 | 0.84 |
| ***Stimulation*** | 1 | 87 | 0.88 | 0.35 |
| ***Age*** | 1 | 87 | 0.82 | 0.37 |
| ***Sex*** | 1 | 87 | 1.90 | 0.17 |
| ***Group:stimulation*** | 1 | 87 | 0.23 | 0.63 |
| ***Accuracy Avoid-B*** | | | | |
| ***(Intercept)*** | 1 | 87 | 0.00 | 0.10 |
| ***Group*** | 1 | 87 | 0.62 | 0.43 |
| ***Stimulation*** | 1 | 87 | 0.11 | 0.74 |
| ***Age*** | 1 | 87 | 0.28 | 0.60 |
| ***Sex*** | 1 | 87 | 0.24 | 0.63 |
| ***Group:stimulation*** | 1 | 87 | 0.49 | 0.49 |
